# Supplementary material for: Enhancement of PbS quantum dot-sensitized photocurrents using plasmonic gold nanoparticles
Source: Royal Society of Chemistry journal article supplement (doi:10.1039/c3cp53625d), 2013-10-15
Supplement: c3cp53625d.pdf [file c3cp53625d.pdf]

Electronic Supplementary Information

**Enhancement of PbS Quantum Dot-Sensitized Photocurrents by Plasmonic  
Gold Nanoparticles**

**Tokuhisa Kawawaki and Tetsu Tatsuma\***

*Institute of Industrial Science, The University of Tokyo,*

*4-6-1 Komaba, Meguro-ku, Tokyo 153-8505, Japan.*

***Corresponding Author***

*\*E-mail: tatsuma@iis.u-tokyo.ac.jp*

As the  $\text{TiO}_2$  thickness increases, extinction peaks due to interference of the ITO/ $\text{TiO}_2$  film on a glass substrate redshifts (Fig. S1). We measured the  $\text{TiO}_2$  thickness by scanning electron microscopy (SEM) and plotted the peak at 500-700 nm against the thickness (Fig. S2). On the basis of the calibration curve thus obtained, we evaluated the  $\text{TiO}_2$  thickness of the samples used in the present work.

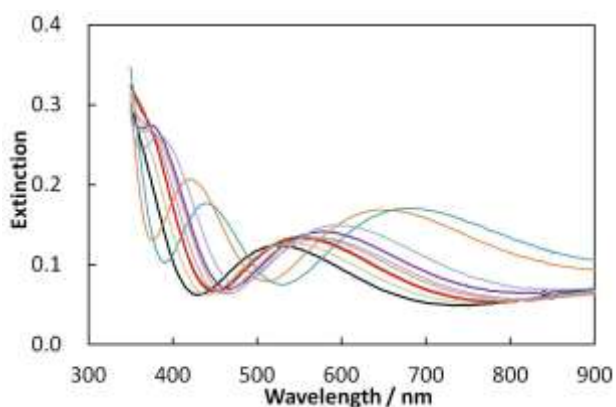

**Fig. S1** Extinction spectra of the ITO/ $\text{TiO}_2$  films on a glass substrate.

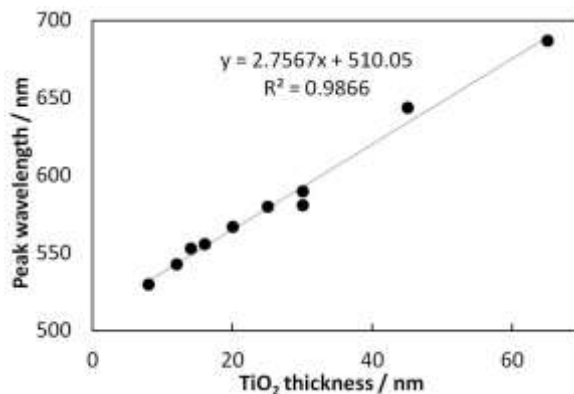

**Fig. S2** Peak wavelength in Figure S1 plotted as a function of the  $\text{TiO}_2$  thickness measured by SEM.
